# Supplementary material
Source: Research Square preprint supplement (doi:10.21203/rs.3.rs-9877472/v1)
Supplement: Supplementary file 1 [file 4a30cea7fda646bcb1f692e1.docx]

**Supporting Information**

**Study on lithium battery heat dissipation based on a fence structure of liquid cooling and phase change optimization**

Youliang Chen1, Bo Zhao1,2*, fengye Li2

1 Hubei Key Laboratory for Efficient Utilization and Agglomeration of Metallurgic Mineral Resources, Wuhan University of Science and Technology, Wuhan, 430081, P.R. China

2 Industrial Safety Engineering Technology Research Center of Hubei Province, Wuhan University of Science and Technology, Wuhan, 430081, P.R. China


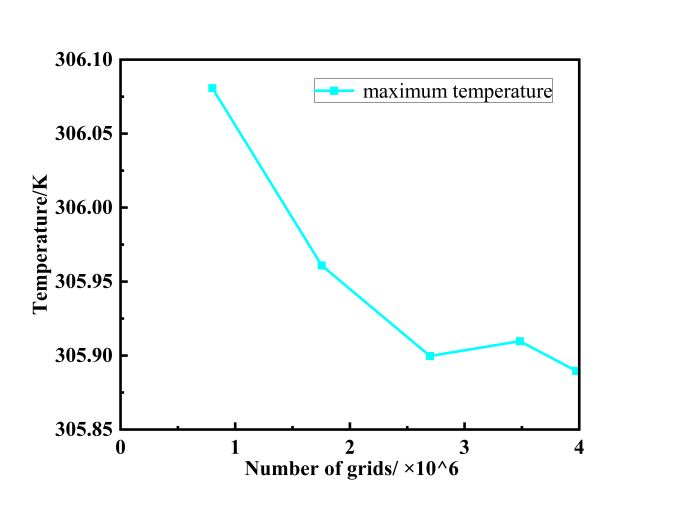


Fig. S1 Mesh independence verification


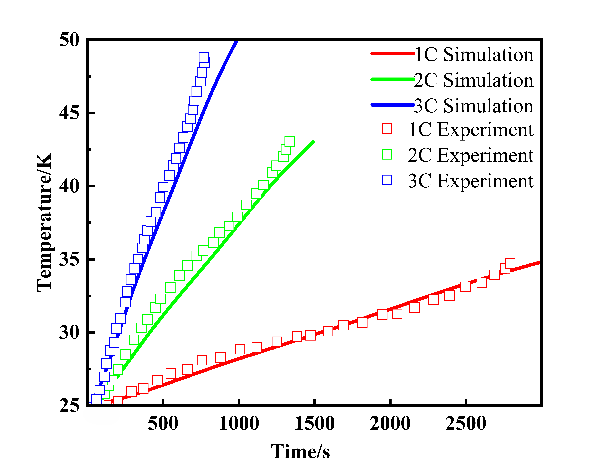


Fig. S2 The accuracy of the lithium battery thermal behavior model


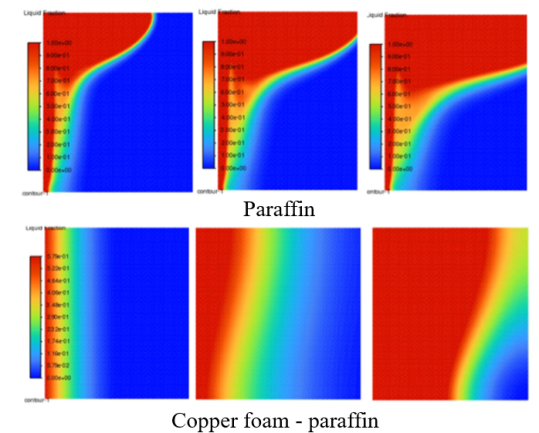


Fig. S3 Numerical simulation contours of liquid fraction for paraffin and copper foam-paraffin


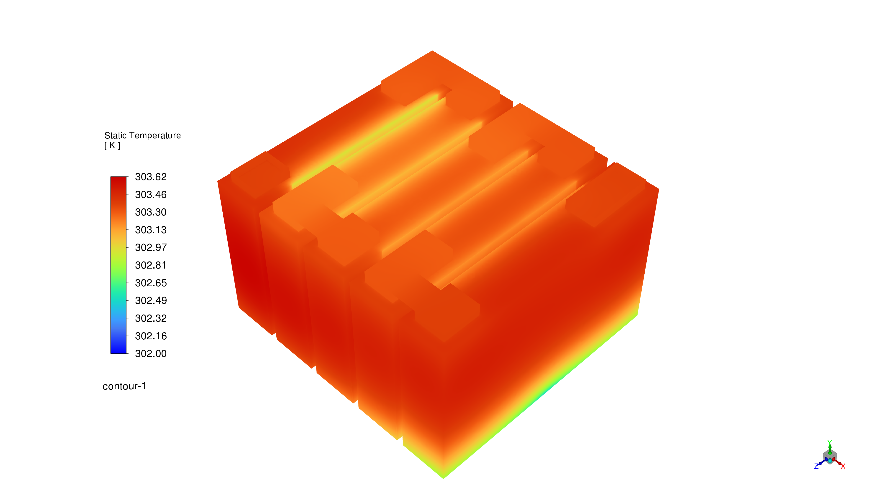

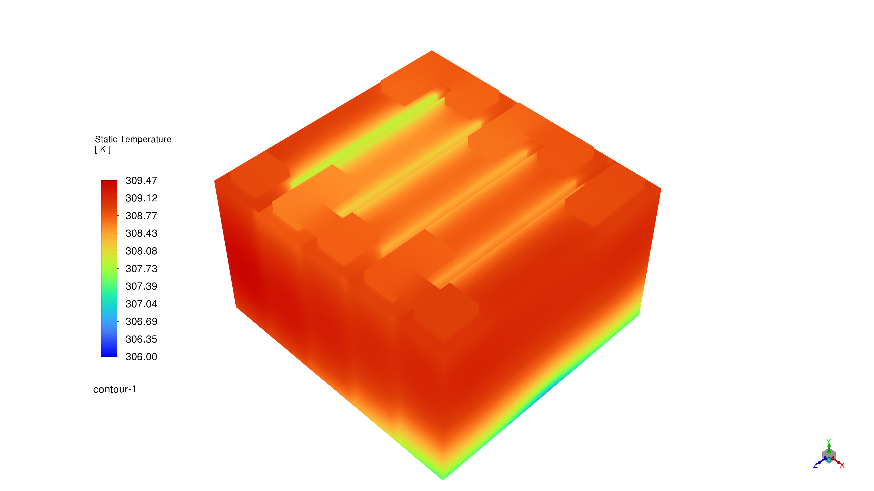


1C 2C


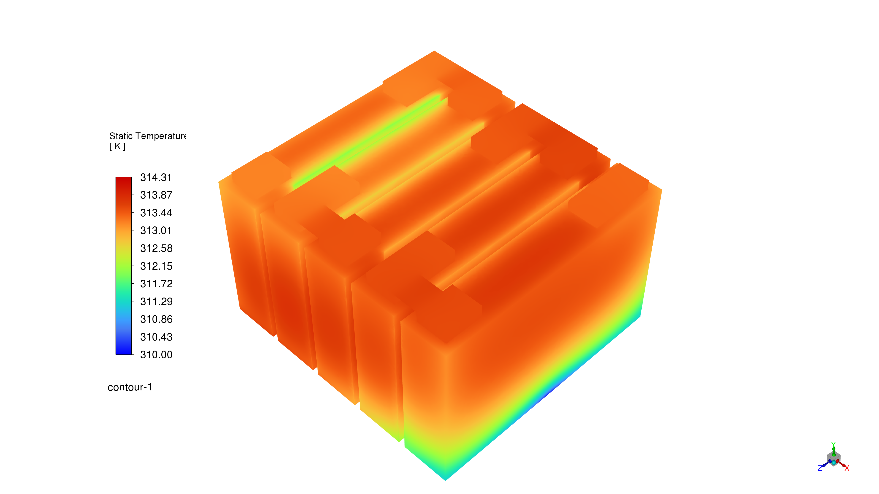

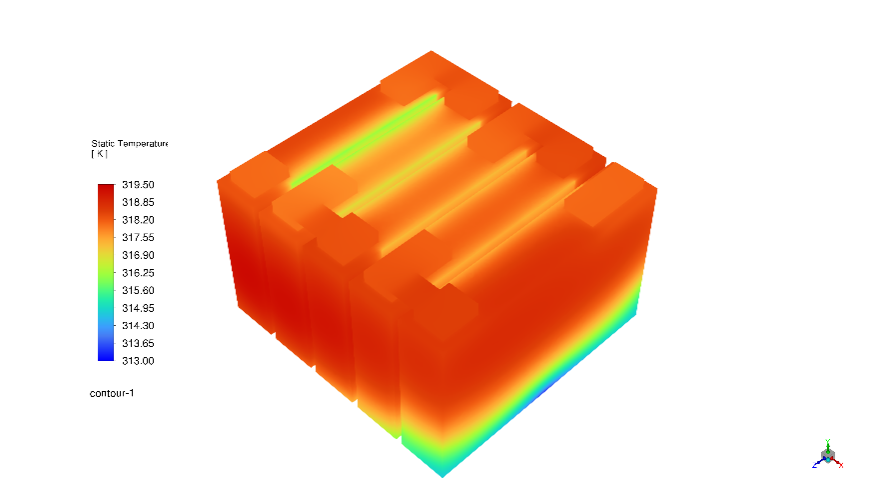


3C 4C

Fig. S4 The temperature cloud at different discharge rates


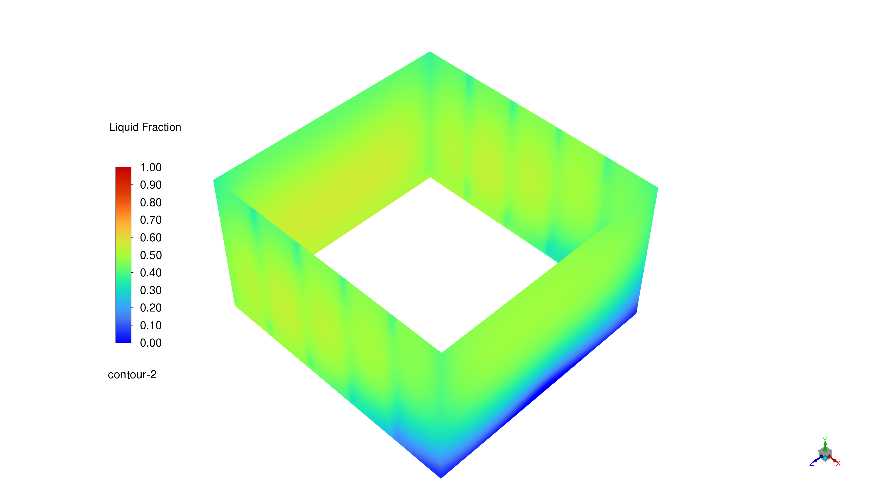

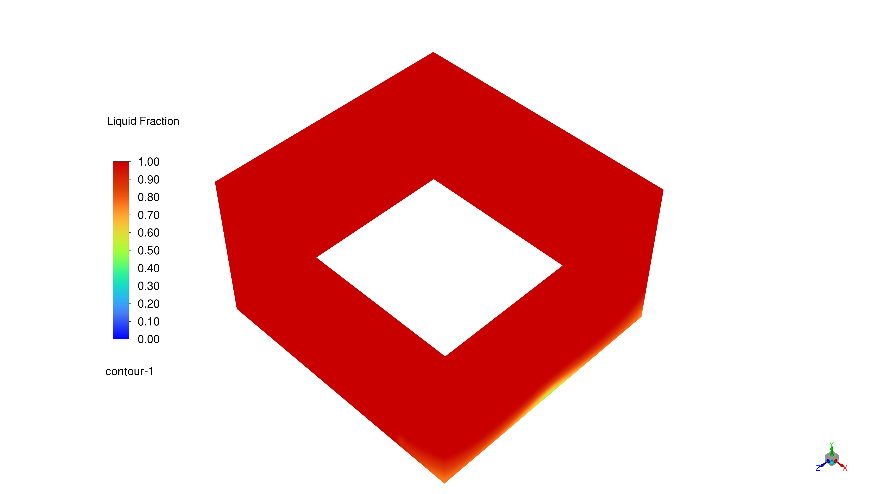


Fig. S5 Liquid fraction contours for hybrid cooling at discharge rates 3 C and 4 C


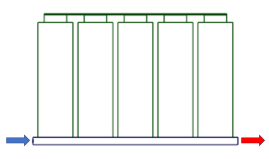

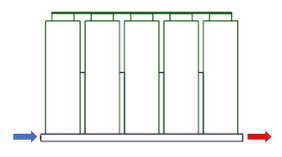

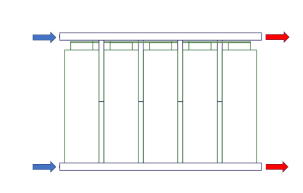

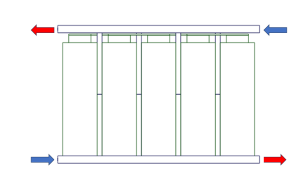

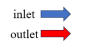


Case1 case2 Case3 case4

Fig. S6 Different arrangement of clod plate


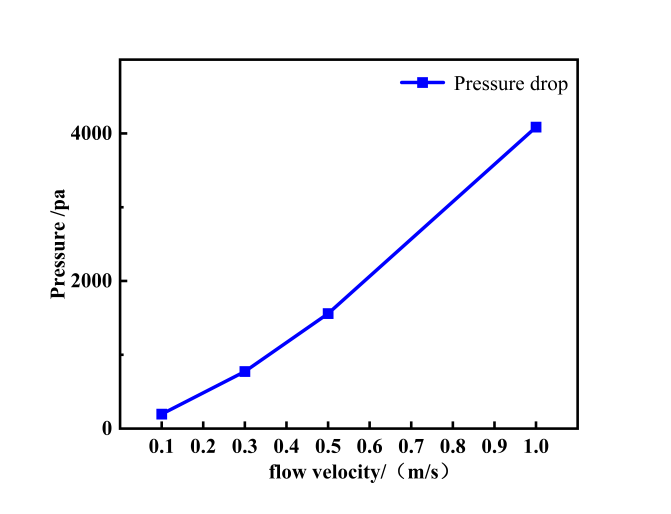


Fig. S7 Pressure drop under different flow velocity
